# Supplementary material for: Dissolved Mn(III) is a key redox intermediate in sediments of a seasonally euxinic coastal basin
Source: Copernicus journal article supplement (doi:10.5194/bg-22-751-2025), 2025-02-11
Supplement: Supplementary file 1 [file bg-22-751-2025-supplement.zip]

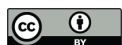

*Supplement of*

**Dissolved Mn(III) is a key redox intermediate in sediments of a seasonally euxinic coastal basin**

**Robin Klomp et al.**

*Correspondence to:* Robin Klomp (robin.klomp@ru.nl)

- bg-22-751-2025-supplement-title-page.pdf
- Klomp\_Biogeosciences\_2024\_Data.xlsx
- Supplements\_Robin\_Klomp\_Grevelingen\_2020\_edited.pdf

The copyright of individual parts of the supplement might differ from the article licence.
