# Supplementary material for: Dissolved Mn(III) is a key redox intermediate in sediments of a seasonally euxinic coastal basin
Source: Copernicus journal article supplement (doi:10.5194/bg-22-751-2025), 2025-02-11
Supplement: Supplementary file 1 [file bg-22-751-2025-supplement.zip]

## Sheet: Fig. 2 Water Column 
CTD			Dissolved Mn - Niskin bottle
Depth (m)	O2 (%)		Depth (m)	Mn total	dMn(II) 1 (umol/L)	dMn(II) 2 (umol/L)	dMn(II) 3 (umol/L)	dMn(II) average (umol/L)	dMn(III) 1 (umol/L)	dMn(III) 2 (umol/L)	dMn(III) 3 (umol/L)	dMn(III) average (umol/L)
0.783	209.033		1	0.165621	-	-	-	-	-	-	-	-
0.84	209.008		3	0.141586	-	-	-	-	-	-	-	-
0.914	209.158		6	0.138267	-	-	-	-	-	-	-	-
1.086	208.981		10	0.271267	-	-	-	-	-	-	-	-
1.02	208.957		15	0.297935	-	-	-	-	-	-	-	-
0.914	208.935		20	0.591124	-	-	-	-	-	-	-	-
0.906	208.915		25	1.75377	5.01058e-09	4.60194e-09	0.450383	0.150128	1.00753	1.05932	0.769015	0.945289
0.84	208.887		30	2.35039	0.05	0.0583334	1.23174e-07	0.0361112	2.85019	2.53112	2.00565	2.46232
0.979	208.863		32	3.01262	0.225	0.153816	1.23174e-07	0.126272	2.75523	2.68046	2.63183	2.68917
0.906	208.838		35	8.1252	3.03373e-10	1.78401e-08	1.23174e-07	4.71058e-08	7.72599	8.19209	7.66949	7.86252
0.963	208.821		38	18.9797	3.03373e-10	6.67577e-11	5.09412e-10	2.93181e-10	16.6243	17.1092	17.58	17.1045
1.037	208.809		40	21.4736	1.71786e-10	4.7486e-11	3.80206e-10	1.99826e-10	16.855	17.5047	19.1525	17.8374
1.143	208.806		42	21.6269	-	-	-	-	-	-	-	-
1.143	208.812		43	22.1193	1.71648e-10	4.69207e-11	3.80206e-10	1.99592e-10	18.4463	20.2731	19.7363	19.4852
0.979	208.81
1.143	208.805
1.086	208.799
1.036	208.791
1.143	208.789
1.143	208.786
1.143	208.612
1.282	208.603
1.143	208.757
1.143	208.582
1.216	208.561
1.208	208.714
1.208	208.72
1.339	208.561
1.266	208.556
1.266	208.735
1.339	208.761
1.323	208.783
1.323	208.806
1.405	208.83
1.446	208.859
1.388	208.885
1.511	208.92
1.519	208.951
1.446	208.98
1.511	208.996
1.519	209.018
1.568	209.064
1.511	209.098
1.585	208.947
1.568	209.141
1.568	209.169
1.585	209.195
1.691	209.207
1.691	209.229
1.691	209.23
1.707	209.234
1.748	209.257
1.691	209.26
1.765	209.265
1.748	209.27
1.814	209.273
1.707	209.268
1.814	209.279
1.814	209.291
1.814	209.299
1.764	209.306
1.871	209.318
1.871	209.325
1.887	209.332
1.871	209.329
1.871	209.325
1.83	209.32
1.936	209.322
1.871	209.326
1.936	209.316
1.944	209.305
1.936	209.308
1.936	209.293
1.944	209.275
1.994	209.279
1.936	209.279
2.133	209.27
1.993	209.252
1.993	209.249
2.116	209.256
2.067	209.262
2.059	209.259
2.174	209.263
2.133	209.261
2.173	209.26
2.116	209.259
2.239	209.263
2.133	209.261
2.239	209.265
2.296	209.272
2.19	209.275
2.362	209.28
2.296	209.265
2.255	209.268
2.476	209.274
2.362	209.27
2.362	209.269
2.435	209.094
2.362	209.247
2.476	209.072
2.37	209.052
2.476	209.035
2.476	209.018
2.542	209.01
2.493	209.001
2.476	208.99
2.599	208.981
2.558	208.974
2.542	208.973
2.542	208.967
2.664	208.956
2.681	208.943
2.599	208.933
2.664	208.759
2.615	208.735
2.664	208.714
2.664	208.691
2.722	208.669
2.681	208.649
2.664	208.632
2.787	208.623
2.738	208.612
2.721	208.599
2.721	208.586
2.787	208.586
2.795	208.585
2.787	208.579
2.787	208.587
2.844	208.595
2.795	208.594
2.844	208.596
2.901	208.608
2.795	208.618
2.901	208.461
2.901	208.447
2.901	208.604
2.918	208.609
2.967	208.444
2.967	208.437
2.983	208.432
3.024	208.434
3.024	208.441
3.09	208.451
3.106	208.455
3.09	208.457
3.147	208.465
3.09	208.453
3.221	208.472
3.147	208.474
3.212	208.306
3.221	208.47
3.27	208.477
3.27	208.31
3.27	208.301
3.286	208.297
3.27	208.295
3.327	208.293
3.327	208.295
3.409	208.302
3.327	208.306
3.392	208.314
3.409	208.326
3.45	208.318
3.392	208.308
3.392	208.303
3.466	208.128
3.515	208.107
3.449	208.088
3.449	208.077
3.589	208.068
3.392	208.055
3.572	208.051
3.408	208.037
3.63	207.865
3.515	207.843
3.515	207.831
3.531	207.821
3.572	207.814
3.515	207.807
3.572	207.631
3.646	207.613
3.572	207.597
3.629	207.571
3.629	207.547
3.588	207.543
3.695	207.376
3.695	207.349
3.695	207.326
3.711	207.306
3.752	207.288
3.752	207.272
3.768	207.259
3.818	207.251
3.818	207.246
3.818	207.075
3.834	207.067
3.875	207.062
3.94	207.063
3.94	207.051
3.891	207.05
3.998	207.052
3.998	207.04
3.94	207.038
4.014	207.051
4.055	206.892
4.055	206.891
4.055	206.89
4.071	206.889
4.12	206.897
4.055	206.907
4.178	206.925
4.137	206.941
4.12	206.789
4.243	206.801
4.178	206.799
4.137	206.795
4.243	206.801
4.243	206.81
4.243	206.82
4.317	206.661
4.243	206.662
4.243	206.67
4.3	206.67
4.317	206.665
4.3	206.663
4.3	206.671
4.3	206.687
4.374	206.535
4.3	206.516
4.366	206.501
4.366	206.494
4.374	206.491
4.366	206.493
4.423	206.331
4.366	206.489
4.439	206.316
4.423	206.3
4.48	206.295
4.423	206.295
4.497	206.297
4.48	206.128
4.546	206.117
4.546	206.108
4.562	206.088
4.603	206.069
4.546	206.054
4.669	206.047
4.619	206.053
4.669	205.894
4.669	205.884
4.726	205.88
4.685	205.877
4.783	205.885
4.726	205.879
4.849	205.88
4.742	205.878
4.849	205.888
4.783	205.899
4.906	205.742
4.865	205.747
4.906	205.756
4.906	205.752
4.906	205.753
4.988	205.761
4.971	205.771
4.906	205.785
5.029	205.634
4.971	205.642
4.988	205.635
5.029	205.633
5.029	205.635
5.094	205.643
4.988	205.477
5.094	205.478
4.971	205.478
5.094	205.488
5.045	205.309
5.151	205.293
5.094	205.281
5.094	205.275
5.11	205.276
5.094	205.106
5.151	205.081
5.151	205.078
5.045	205.06
5.274	205.055
5.151	204.872
5.274	204.857
5.151	204.845
5.225	204.822
5.209	204.63
5.274	204.603
5.274	204.403
5.348	204.369
5.331	204.339
5.274	204.316
5.397	204.306
5.413	204.104
5.331	204.063
5.397	203.856
5.454	203.816
5.52	203.783
5.413	203.579
5.52	203.542
5.52	203.514
5.52	203.318
5.536	203.289
5.577	203.253
5.577	203.05
5.634	203.011
5.577	202.976
5.651	202.783
5.7	202.755
5.577	202.56
5.7	202.537
5.716	202.501
5.757	202.473
5.7	202.279
5.757	202.255
5.757	202.066
5.716	202.046
5.822	202.022
5.88	201.834
5.757	201.806
5.839	201.794
5.822	201.772
5.822	201.587
5.88	201.571
5.88	201.393
5.839	201.38
5.937	201.367
5.88	201.357
5.937	201.184
5.896	201.179
5.88	201.188
5.937	201.017
5.937	201.012
5.937	201.019
5.961	201.038
6.06	200.88
5.88	200.884
6.06	200.717
5.961	200.71
6.06	200.72
6.06	200.738
6.06	200.595
6.06	200.602
6.142	200.623
6.125	200.634
6.125	200.66
6.182	200.521
6.182	200.533
6.264	200.381
6.248	200.395
6.248	200.403
6.305	200.422
6.322	200.454
6.305	200.302
6.363	200.318
6.305	200.345
6.428	200.192
6.387	200.206
6.363	200.212
6.485	200.233
6.485	200.26
6.428	200.297
6.444	200.326
6.551	200.368
6.485	200.223
6.551	200.421
6.551	200.296
6.502	200.315
6.551	200.347
6.551	200.388
6.608	200.263
6.551	200.284
6.624	200.318
6.608	200.339
6.608	200.368
6.608	200.407
6.624	200.279
6.673	200.298
6.608	200.32
6.608	200.353
6.673	200.381
6.69	200.238
6.673	200.26
6.673	200.291
6.731	200.313
6.673	200.337
6.747	200.353
6.731	200.377
6.731	200.235
6.788	200.252
6.788	200.261
6.813	200.275
6.853	200.299
6.788	200.151
6.911	200.171
6.853	200.176
6.87	200.19
6.976	200.195
6.911	200.203
7.034	200.217
6.976	200.236
6.927	200.258
7.091	200.1
7.034	200.274
7.091	200.124
7.033	200.118
7.115	200.118
7.156	200.124
7.156	200.133
7.156	200.147
7.214	200.168
7.173	200.19
7.214	200.045
7.214	200.044
7.279	200.068
7.279	200.077
7.279	200.093
7.295	200.115
7.279	200.138
7.279	200.151
7.336	200.168
7.336	200.017
7.353	200.026
7.459	200.044
7.336	200.06
7.402	200.07
7.402	200.081
7.353	200.092
7.459	200.112
7.402	199.96
7.402	199.952
7.459	199.951
7.418	199.952
7.459	199.958
7.459	199.968
7.459	199.984
7.516	200.004
7.402	200.005
7.541	200.019
7.516	200.029
7.516	200.047
7.582	200.068
7.582	200.073
7.598	200.081
7.516	200.091
7.639	200.107
7.639	200.123
7.639	200.142
7.664	200.165
7.762	200.193
7.705	200.222
7.762	200.237
7.827	200.272
7.762	200.29
7.844	200.314
7.827	200.335
7.827	200.359
7.885	200.388
7.885	200.592
7.778	200.637
8.065	200.52
8.007	200.535
7.942	200.725
7.942	200.762
8.065	200.803
8.024	200.839
7.942	200.7
8.065	200.9
8.065	200.938
8.065	200.98
8.065	201.004
8.024	201.026
8.188	201.227
8.065	201.089
8.188	201.116
8.13	201.311
8.089	201.349
8.245	201.393
8.187	201.411
8.13	201.428
8.187	201.446
8.187	201.461
8.147	201.474
8.187	201.487
8.13	201.496
8.31	201.512
8.187	201.69
8.245	201.716
8.204	201.735
8.245	201.756
8.245	201.773
8.31	201.788
8.31	201.801
8.31	201.81
8.269	201.818
8.368	201.825
8.368	201.829
8.433	201.831
8.368	201.83
8.49	202.005
8.449	201.842
8.49	201.834
8.49	201.998
8.556	202.006
8.49	202.007
8.613	202.007
8.629	202.005
8.613	202.015
8.613	202.024
8.67	202.013
8.67	201.998
8.67	201.999
8.695	201.998
8.736	201.995
8.736	201.989
8.793	201.964
8.736	202.125
8.793	201.956
8.752	201.939
8.859	202.097
8.859	202.094
8.793	202.104
8.859	202.096
8.859	202.082
8.875	202.262
8.916	202.282
8.859	202.12
8.981	202.294
8.916	202.302
8.916	202.31
8.998	202.316
8.916	202.316
8.981	202.316
8.916	202.308
8.981	202.302
9.039	202.312
8.981	202.318
8.998	202.321
8.981	202.322
9.039	202.322
8.981	202.319
9.096	202.142
9.039	202.294
9.12	202.286
9.039	202.272
9.161	202.261
9.039	202.067
9.161	202.036
9.096	202.017
9.178	202.156
9.219	201.961
9.161	201.936
9.284	201.916
9.219	201.89
9.341	201.87
9.284	201.847
9.366	201.828
9.341	201.627
9.407	201.585
9.407	201.541
9.407	201.497
9.407	201.451
9.522	201.41
9.481	201.364
9.522	201.32
9.522	201.295
9.522	201.251
9.522	201.207
9.587	201.009
9.481	200.965
9.644	200.929
9.644	200.892
9.587	200.854
9.587	200.837
9.644	200.823
9.644	200.79
9.603	200.605
9.644	200.584
9.71	200.569
9.644	200.548
9.71	200.359
9.71	200.327
9.71	200.299
9.669	200.275
9.71	200.256
9.767	200.067
9.71	200.036
9.767	200.015
9.71	199.82
9.767	199.79
9.726	199.743
9.824	199.546
9.767	199.51
9.824	199.483
9.767	199.456
9.89	199.425
9.89	199.22
9.849	199.177
9.89	199.158
9.89	199.129
9.89	199.104
9.947	198.912
10.013	198.885
10.012	198.862
9.849	198.842
10.193	198.841
10.07	198.816
10.012	198.625
10.135	198.601
10.193	198.581
10.135	198.567
10.135	198.56
10.209	198.389
10.25	198.379
10.25	198.376
10.193	198.379
10.25	198.392
10.315	198.394
10.25	198.4
10.397	198.416
10.315	198.435
10.315	198.461
10.373	198.322
10.315	198.344
10.438	198.381
10.438	198.401
10.373	198.427
10.397	198.461
10.438	198.501
10.438	198.531
10.438	198.389
10.438	198.413
10.495	198.446
10.495	198.483
10.438	198.506
10.52	198.538
10.495	198.572
10.561	198.598
10.438	198.623
10.561	198.662
10.561	198.689
10.561	198.542
10.561	198.557
10.577	198.576
10.618	198.601
10.561	198.608
10.618	198.624
10.618	198.644
10.618	198.666
10.618	198.692
10.675	198.534
10.7	198.536
10.741	198.541
10.675	198.551
10.798	198.568
10.741	198.586
10.798	198.59
10.864	198.597
10.798	198.605
10.88	198.62
10.864	198.463
10.921	198.626
10.921	198.459
10.986	198.452
10.921	198.445
10.986	198.447
11.044	198.453
11.003	198.46
11.044	198.475
11.101	198.492
11.044	198.511
11.044	198.514
11.101	198.522
11.101	198.532
11.101	198.544
11.101	198.562
11.183	198.584
11.166	198.432
11.166	198.441
11.166	198.434
11.166	198.431
11.166	198.429
11.224	198.434
11.166	198.437
11.125	198.443
11.404	198.453
11.224	198.452
11.224	198.461
11.224	198.301
11.289	198.305
11.289	198.47
11.289	198.308
11.346	198.312
11.305	198.31
11.289	198.313
11.346	198.321
11.289	198.328
11.346	198.341
11.404	198.355
11.346	198.353
11.404	198.353
11.469	198.35
11.485	198.338
11.403	198.328
11.526	198.332
11.526	198.168
11.526	198.338
11.526	198.354
11.592	198.375
11.592	198.381
11.649	198.409
11.592	198.418
11.674	198.429
11.649	198.441
11.772	198.453
11.715	198.464
11.715	198.474
11.772	198.487
11.772	198.502
11.829	198.698
11.772	198.562
11.731	198.586
11.952	198.615
11.829	198.812
11.895	198.683
11.829	198.702
11.952	198.698
11.895	198.688
11.952	198.692
11.952	198.7
11.894	198.706
11.911	198.701
12.017	198.699
12.017	198.706
11.952	198.717
11.952	198.734
12.017	198.75
12.017	198.571
12.017	198.547
12.075	198.552
12.017	198.539
12.017	198.529
12.156	198.512
12.074	198.492
12.017	198.303
12.14	198.277
12.074	198.252
12.14	198.232
12.14	198.033
12.14	198.161
12.14	197.962
12.074	197.923
12.222	197.896
12.197	197.865
12.255	197.824
12.197	197.624
12.254	197.576
12.254	197.521
12.32	197.304
12.32	197.25
12.377	197.203
12.32	197.152
12.377	196.927
12.402	196.876
12.443	196.835
12.5	196.798
12.443	196.58
12.5	196.518
12.5	196.477
12.565	196.432
12.565	196.398
12.565	196.193
12.565	196.169
12.623	195.967
12.647	196.101
12.565	195.906
12.68	195.699
12.623	195.652
12.623	195.444
12.68	195.403
12.623	195.538
12.746	195.35
12.746	195.325
12.68	195.13
12.746	195.101
12.745	195.079
12.705	194.873
12.68	194.831
12.803	194.628
12.745	194.584
12.745	194.554
12.745	194.367
12.803	194.348
12.868	194.321
12.803	194.296
12.803	194.108
12.868	194.09
12.803	193.888
12.95	193.874
12.926	193.843
12.868	193.645
12.925	193.621
12.925	193.604
12.868	193.42
12.983	193.392
13.048	193.383
12.925	193.389
13.048	193.218
13.048	193.211
13.106	193.041
13.048	193.039
13.073	193.03
13.106	192.851
13.171	192.838
13.171	192.836
13.105	192.652
13.171	192.645
13.228	192.653
13.228	192.496
13.294	192.51
13.228	192.511
13.228	192.349
13.351	192.34
13.294	192.36
13.253	192.199
13.474	192.182
13.294	192.161
13.408	192.146
13.351	191.972
13.351	191.99
13.474	192.006
13.408	192.028
13.408	191.874
13.474	191.889
13.474	191.915
13.474	191.932
13.531	191.788
13.474	191.79
13.531	191.807
13.498	191.659
13.531	191.666
13.474	191.677
13.654	191.698
13.531	191.55
13.531	191.557
13.596	191.579
13.596	191.595
13.596	191.447
13.654	191.468
13.596	191.481
13.719	191.507
13.596	191.365
13.654	191.376
13.719	191.397
13.678	191.429
13.719	191.3
13.776	191.317
13.719	191.335
13.834	191.347
13.776	191.37
13.899	191.23
13.776	191.233
13.834	191.253
13.899	191.283
13.956	191.135
13.899	191.152
13.899	191.18
14.022	191.197
13.956	191.043
14.022	191.06
13.981	191.06
14.022	191.07
14.079	190.919
14.079	190.917
14.079	190.921
14.145	190.935
14.079	190.769
14.145	190.749
14.079	190.74
14.145	190.746
14.145	190.761
14.202	190.594
14.202	190.59
14.202	190.591
14.259	190.604
14.145	190.432
14.259	190.612
14.202	190.468
14.226	190.471
14.259	190.478
14.259	190.313
14.202	190.307
14.259	190.302
14.382	190.309
14.259	190.332
14.325	190.192
14.325	190.193
14.325	190.192
14.325	190.199
14.382	190.219
14.382	190.229
14.447	190.072
14.382	190.239
14.447	190.087
14.447	190.084
14.447	190.093
14.447	190.107
14.505	189.953
14.464	189.966
14.562	189.971
14.562	189.981
14.562	190.002
14.627	190.032
14.627	190.05
14.627	189.901
14.562	189.916
14.685	189.957
14.685	189.991
14.685	190.026
14.685	189.882
14.75	189.899
14.807	189.901
14.75	189.898
14.807	189.897
14.807	189.735
14.873	189.729
14.807	189.73
14.807	189.744
14.93	189.786
14.873	189.832
14.873	189.852
14.955	189.87
14.93	189.89
14.987	189.734
14.93	189.721
14.987	189.75
14.93	189.765
14.987	189.606
15.053	189.61
14.987	189.598
14.987	189.421
14.987	189.411
15.053	189.408
15.053	189.408
14.987	189.393
15.11	189.213
15.053	189.193
15.053	189.186
15.11	189.188
15.11	189.02
15.176	189.001
15.11	189.003
15.11	188.818
15.176	188.797
15.176	188.78
15.176	188.773
15.233	188.756
15.2	188.57
15.298	188.551
15.298	188.54
15.298	188.545
15.298	188.556
15.413	188.575
15.298	188.569
15.356	188.4
15.413	188.393
15.413	188.392
15.478	188.224
15.478	188.203
15.413	188.187
15.536	188.184
15.478	188.01
15.478	188.003
15.601	187.99
15.536	187.979
15.536	187.979
15.601	187.809
15.601	187.798
15.601	187.797
15.601	187.629
15.658	187.631
15.658	187.642
15.658	187.641
15.658	187.648
15.724	187.667
15.658	187.518
15.724	187.692
15.724	187.544
15.724	187.561
15.724	187.566
15.781	187.578
15.724	187.594
15.781	187.621
15.781	187.654
15.806	187.677
15.781	187.533
15.781	187.558
15.838	187.593
15.838	187.618
15.904	187.645
15.838	187.668
15.904	187.679
15.904	187.695
15.904	187.718
15.904	187.576
15.961	187.596
15.961	187.603
15.961	187.619
16.027	187.643
15.961	187.672
16.084	187.71
16.027	187.75
16.027	187.795
16.141	187.833
16.084	187.871
16.084	187.917
16.141	187.776
16.207	187.969
16.141	188.007
16.207	187.881
16.264	187.898
16.207	187.919
16.207	187.945
16.264	187.976
16.329	188.009
16.264	188.024
16.387	188.047
16.329	188.069
16.329	188.078
16.329	187.919
16.387	187.919
16.452	187.923
16.387	187.929
16.452	187.942
16.452	187.939
16.452	187.955
16.452	187.957
16.509	187.963
16.452	187.793
16.509	187.786
16.567	187.785
16.452	187.783
16.567	187.616
16.509	187.604
16.567	187.583
16.567	187.565
16.509	187.549
16.632	187.365
16.567	187.338
16.567	187.318
16.632	187.302
16.632	187.114
16.632	187.087
16.632	187.047
16.689	186.84
16.689	186.794
16.755	186.754
16.689	186.715
16.689	186.512
16.755	186.473
16.812	186.44
16.812	186.236
16.755	186.193
16.878	186.163
16.878	186.134
16.878	185.917
16.878	185.884
16.935	185.858
16.878	185.643
16.992	185.594
16.992	185.55
16.992	185.517
16.935	185.316
17.058	185.283
16.992	185.255
17.058	185.239
16.992	185.054
17.115	185.041
17.115	185.013
17.115	184.993
17.115	184.981
17.181	184.804
17.115	184.789
17.181	184.788
17.115	184.79
17.181	184.631
17.303	184.639
17.181	184.635
17.303	184.644
17.181	184.479
17.303	184.489
17.238	184.488
17.238	184.499
17.238	184.517
17.361	184.37
17.303	184.385
17.361	184.395
17.303	184.41
17.303	184.435
17.361	184.295
17.361	184.303
17.361	184.32
17.361	184.172
17.418	184.347
17.418	184.197
17.418	184.211
17.418	184.233
17.418	184.248
17.484	184.271
17.483	184.131
17.541	184.137
17.483	184.149
17.606	184.171
17.541	184.199
17.606	184.218
17.541	184.068
17.606	184.084
17.664	184.089
17.664	184.101
17.664	183.946
17.729	183.957
17.729	183.958
17.729	183.964
17.729	183.98
17.729	183.827
17.786	183.824
17.844	183.826
17.844	183.835
17.786	183.851
17.844	183.702
17.786	183.695
17.909	183.701
17.909	183.713
17.967	183.731
17.967	183.912
17.909	183.766
17.967	183.615
17.909	183.623
17.967	183.623
17.966	183.627
18.032	183.466
18.032	183.466
18.032	183.638
18.089	183.638
18.089	183.473
17.999	183.648
18.032	183.503
18.032	183.521
18.089	183.531
18.147	183.546
18.147	183.393
18.147	183.56
18.089	183.417
18.089	183.421
18.089	183.427
18.212	183.441
18.212	183.456
18.212	183.305
18.212	183.3
18.212	183.303
18.269	183.313
18.212	183.327
18.269	183.349
18.269	183.375
18.392	183.391
18.335	183.409
18.392	183.262
18.392	183.276
18.392	183.269
18.392	183.27
18.458	183.28
18.392	183.295
18.458	183.316
18.572	183.326
18.515	183.336
18.515	183.353
18.515	183.373
18.572	183.396
18.515	183.403
18.638	183.414
18.572	183.429
18.671	183.279
18.695	183.292
18.695	183.331
18.638	183.354
18.638	183.354
18.695	183.361
18.695	183.374
18.695	183.391
18.818	183.397
18.695	183.4
18.818	183.424
18.695	183.432
18.76	183.386
18.818	183.319
18.76	183.269
18.76	183.257
18.883	183.202
18.818	183.126
18.818	182.894
18.883	182.869
18.818	182.838
18.818	182.821
18.883	182.811
18.883	182.803
18.941	182.799
18.941	182.779
18.941	182.76
18.973	182.57
18.998	182.536
18.94	182.501
18.998	182.473
19.063	182.457
19.063	182.449
19.063	182.448
18.998	182.259
19.121	182.408
19.186	182.229
19.063	182.203
19.121	182.188
19.186	182.176
19.186	182.165
19.243	182.159
19.243	182.153
19.186	182.15
19.243	182.149
19.309	182.154
19.243	182.157
19.309	181.995
19.309	181.984
19.366	181.961
19.342	181.94
19.424	181.749
19.366	181.705
19.424	181.493
19.424	181.437
19.366	181.215
19.424	180.99
19.489	180.929
19.546	180.703
19.489	180.635
19.546	180.401
19.489	179.974
19.489	179.868
19.546	179.605
19.546	179.336
19.612	178.893
19.546	178.598
19.612	178.457
19.612	177.983
19.546	177.655
19.579	177.321
19.612	176.814
19.669	176.459
19.735	176.101
19.669	175.569
19.669	175.199
19.669	174.641
19.669	174.243
19.669	173.846
19.735	173.284
19.735	172.88
19.792	172.311
19.792	171.908
19.849	171.323
19.792	170.742
19.792	170.312
19.792	169.722
19.849	169.3
19.882	168.889
19.972	168.321
19.972	167.924
19.972	167.371
19.972	166.993
19.972	166.461
19.915	165.931
20.038	165.584
19.972	165.062
20.095	164.72
20.095	164.225
20.152	163.737
20.152	163.413
20.095	163.114
20.095	162.653
20.152	162.207
20.127	161.926
20.218	161.489
20.275	161.234
20.218	160.816
20.218	160.587
20.218	160.202
20.218	159.97
20.218	159.594
20.275	159.393
20.34	159.21
20.34	158.851
20.275	158.663
20.34	158.338
20.34	158.168
20.34	157.841
20.25	157.685
20.34	157.531
20.398	157.218
20.463	157.078
20.398	156.935
20.398	156.636
20.398	156.492
20.463	156.366
20.398	156.083
20.463	155.954
20.52	155.668
20.463	155.534
20.578	155.415
20.463	155.292
20.553	155
20.578	155.051
20.52	154.772
20.578	154.667
20.643	154.577
20.643	154.31
20.701	154.216
20.643	154.116
20.701	154.035
20.701	153.948
20.701	153.859
20.701	153.781
20.701	153.699
20.766	153.458
20.799	153.538
20.823	153.285
20.823	153.368
20.889	153.135
20.823	153.048
20.823	152.955
20.823	152.874
20.889	152.788
21.004	152.711
20.889	152.621
21.004	152.543
20.946	152.455
20.889	152.374
20.979	152.286
20.946	152.202
21.069	152.129
21.069	152.043
21.069	151.962
21.069	151.871
21.069	151.959
21.069	151.878
21.069	151.801
21.004	151.727
21.069	151.642
21.126	151.56
21.159	151.481
21.192	151.389
21.126	151.297
21.192	151.21
21.126	151.106
21.126	151.005
21.126	150.887
21.192	150.772
21.315	150.833
21.192	150.56
21.249	150.43
21.249	150.492
21.282	150.381
21.249	150.27
21.249	150.159
21.315	150.03
21.372	149.9
21.372	149.77
21.429	149.639
21.372	149.679
21.429	149.389
21.429	149.426
21.429	149.307
21.405	149.166
21.495	149.041
21.552	148.895
21.552	148.935
21.552	148.799
21.552	148.663
21.618	148.526
21.618	148.384
21.618	148.414
21.495	148.283
21.675	148.154
21.65	148.018
21.675	148.054
21.74	147.93
21.675	147.8
21.74	147.668
21.675	147.699
21.74	147.573
21.74	147.614
21.798	147.495
21.798	147.388
21.83	147.277
21.855	147.334
21.798	147.228
21.74	147.115
21.798	147.172
21.798	147.068
21.855	147.129
21.855	147.028
21.855	147.091
21.921	146.993
21.855	146.885
21.888	146.941
21.855	146.832
21.855	146.905
21.92	146.798
21.92	146.853
21.978	146.763
21.978	146.831
22.043	146.735
21.92	146.797
22.043	146.699
22.01	146.585
21.978	146.632
22.101	146.515
22.101	146.576
22.101	146.451
22.101	146.505
22.223	146.394
22.166	146.266
22.101	146.299
22.133	146.166
22.223	146.211
22.281	146.089
22.223	146.123
22.346	145.993
22.281	146.02
22.281	145.898
22.281	145.936
22.281	145.975
22.346	145.849
22.436	145.898
22.403	145.772
22.346	145.633
22.346	145.651
22.403	145.689
22.346	145.556
22.469	145.427
22.526	145.455
22.469	145.31
22.502	145.323
22.526	145.182
22.469	145.195
22.469	145.038
22.469	145.054
22.584	144.9
22.584	144.919
22.584	144.766
22.649	144.789
22.559	144.639
22.584	144.645
22.584	144.497
22.584	144.503
22.706	144.357
22.706	144.365
22.649	144.216
22.706	144.055
22.649	144.065
22.682	143.906
22.706	143.747
22.706	143.746
22.706	143.572
22.829	143.402
22.772	143.386
22.829	143.217
22.772	143.03
22.805	143.02
22.772	142.837
22.829	142.64
22.895	142.444
22.895	142.405
22.895	142.214
22.952	142.009
22.952	141.806
22.952	141.762
22.919	141.565
23.075	141.357
23.009	141.319
23.009	141.13
23.075	140.93
23.075	140.733
23.075	140.523
23.075	140.646
23.108	140.288
23.132	140.263
23.132	140.07
23.198	139.867
23.198	139.838
23.198	139.643
23.198	139.451
23.132	139.418
23.23	139.237
23.255	139.043
23.321	139.028
23.198	138.843
23.321	138.668
23.255	138.651
23.198	138.485
23.32	138.481
23.288	138.327
23.32	138.162
23.378	138.176
23.32	138.195
23.378	138.064
23.435	137.922
23.32	137.939
23.32	137.805
23.411	137.836
23.378	137.872
23.501	137.761
23.435	137.803
23.501	137.68
23.435	137.733
23.501	137.615
23.501	137.652
23.41	137.539
23.558	137.59
23.558	137.472
23.623	137.514
23.558	137.405
23.623	137.457
23.558	137.511
23.648	137.398
23.623	137.285
23.681	137.332
23.681	137.379
23.746	137.448
23.746	137.344
23.681	137.396
23.803	137.279
23.648	137.315
23.803	137.219
23.746	137.258
23.861	137.318
23.803	137.375
23.861	137.261
23.861	137.319
23.836	137.203
23.861	137.241
23.926	137.297
23.861	137.349
23.984	137.231
23.926	137.279
23.984	137.327
23.959	137.2
24.049	137.244
23.926	137.11
23.984	137.148
24.049	137.185
24.049	137.214
24.106	137.088
24.016	137.13
24.106	137.171
24.106	137.207
24.049	137.081
24.106	137.109
24.172	137.151
24.106	137.204
24.139	137.082
24.229	137.126
24.172	136.991
24.172	137.196
24.229	137.069
24.172	137.107
24.229	136.969
24.262	136.998
24.286	137.02
24.229	136.88
24.286	136.893
24.286	136.743
24.352	136.76
24.286	136.772
24.262	136.604
24.409	136.606
24.409	136.616
24.352	136.638
24.409	136.482
24.409	136.492
24.409	136.323
24.442	136.322
24.475	136.314
24.475	136.144
24.532	136.141
24.532	135.977
24.532	135.962
24.565	135.959
24.532	135.949
24.598	135.779
24.532	135.773
24.778	135.611
24.598	135.592
24.597	135.414
24.688	135.406
24.712	135.39
24.655	135.385
24.712	135.202
24.712	135.186
24.778	135.183
24.745	135.016
24.778	135
24.778	134.823
24.778	134.813
24.778	134.816
24.778	134.64
24.835	134.633
24.868	134.636
24.958	134.48
24.778	134.472
24.835	134.478
24.9	134.307
24.9	134.147
24.868	134.311
24.9	134.16
24.9	134.158
25.023	134.171
24.958	134.02
24.9	134.019
24.99	133.861
25.023	133.852
24.958	133.854
25.023	133.87
25.023	133.707
25.023	133.712
25.138	133.73
25.048	133.585
25.08	133.592
25.138	133.439
25.138	133.436
25.138	133.444
25.138	133.465
25.17	133.308
25.26	133.321
25.138	133.323
25.26	133.17
25.26	133.181
25.26	133.204
25.228	133.049
25.326	133.064
25.26	133.071
25.383	132.92
25.383	132.915
25.26	132.922
25.416	132.944
25.383	132.802
25.383	132.81
25.44	132.829
25.383	132.858
25.44	132.883
25.473	132.746
25.563	132.758
25.44	132.778
25.563	132.64
25.506	132.647
25.44	132.665
25.596	132.697
25.563	132.546
25.563	132.562
25.629	132.59
25.563	132.608
25.653	132.448
25.629	132.469
25.629	132.484
25.563	132.509
25.686	132.374
25.686	132.384
25.719	132.406
25.686	132.418
25.686	132.441
25.751	132.299
25.751	132.318
25.751	132.328
25.719	132.176
25.751	132.193
25.809	132.202
25.809	132.22
25.809	132.059
25.866	132.063
25.841	132.075
25.809	132.096
25.866	132.109
25.931	131.96
25.808	131.973
25.899	131.981
25.931	131.824
25.989	131.83
25.989	131.826
25.989	131.66
25.931	131.658
26.021	131.649
26.054	131.648
25.988	131.482
26.111	131.484
26.054	131.475
26.079	131.302
26.234	131.296
26.111	131.296
26.111	131.306
26.177	131.137
26.234	131.13
26.201	131.136
26.234	130.96
26.177	130.947
26.291	130.775
26.357	130.769
26.201	130.751
26.291	130.746
26.291	130.574
26.357	130.57
26.357	130.383
26.357	130.36
26.324	130.347
26.414	130.346
26.414	130.163
26.357	130.145
26.357	130.137
26.447	129.972
26.479	130.146
26.357	129.983
26.479	129.814
26.479	129.809
26.504	129.797
26.479	129.792
26.414	129.625
26.537	129.625
26.537	129.615
26.504	129.613
26.537	129.624
26.537	129.473
26.602	129.491
26.602	129.328
26.602	129.33
26.627	129.342
26.659	129.348
26.659	129.191
26.659	129.199
26.659	129.2
26.692	129.039
26.782	129.046
26.717	129.06
26.717	129.066
26.782	128.913
26.807	128.927
26.839	128.935
26.782	128.95
26.782	128.805
26.839	128.825
26.872	128.837
26.905	128.685
26.839	128.698
26.905	128.705
26.962	128.551
26.929	128.544
26.905	128.546
26.962	128.56
26.962	128.582
27.027	128.426
26.995	128.434
27.027	128.436
27.027	128.446
27.027	128.293
27.085	128.307
27.109	128.31
27.027	128.321
27.085	128.343
27.142	128.186
27.085	128.381
27.109	128.242
27.142	128.249
27.142	128.265
27.265	128.29
27.142	128.32
27.175	128.17
27.265	128.187
27.207	128.209
27.207	128.24
27.265	128.109
27.232	128.124
27.265	128.148
27.265	128.162
27.33	128.185
27.265	128.213
27.297	128.25
27.387	128.105
27.33	128.122
27.387	128.15
27.265	128.166
27.477	128.194
27.387	128.224
27.453	128.093
27.453	128.107
27.355	128.126
27.51	128.154
27.51	128.188
27.51	128.038
27.51	128.051
27.535	128.07
27.567	128.08
27.633	128.095
27.633	128.117
27.567	128.125
27.6	127.968
27.69	127.974
27.633	127.983
27.756	128.002
27.723	128.007
27.756	127.847
27.69	127.847
27.813	127.855
27.756	127.849
27.78	127.85
27.813	127.857
27.813	127.869
27.813	127.716
27.878	127.707
27.837	127.548
27.936	127.536
27.813	127.526
27.878	127.526
27.903	127.531
27.936	127.542
27.878	127.542
27.936	127.55
27.936	127.562
28.026	127.581
27.878	127.413
27.993	127.409
27.993	127.408
27.96	127.412
28.058	127.425
27.993	127.441
27.993	127.463
28.058	127.475
28.083	127.491
28.058	127.512
28.058	127.538
28.115	127.398
27.993	127.415
28.206	127.425
28.181	127.438
28.115	127.454
28.238	127.478
28.205	127.504
28.181	127.517
28.238	127.535
28.238	127.557
28.263	127.583
28.304	127.443
28.304	127.462
28.361	127.485
28.304	127.494
28.385	127.511
28.304	127.528
28.418	127.553
28.361	127.58
28.385	127.594
28.418	127.612
28.484	127.635
28.484	127.486
28.418	127.669
28.508	127.703
28.484	127.567
28.484	127.573
28.484	127.581
28.631	127.578
28.541	127.573
28.541	127.746
28.541	127.593
28.574	127.599
28.664	127.608
28.606	127.619
28.664	127.633
28.606	127.476
28.631	127.48
28.663	127.469
28.721	127.461
28.663	127.455
28.754	127.453
28.721	127.454
28.721	127.457
28.721	127.289
28.753	127.283
28.786	127.279
28.843	127.279
28.786	127.282
28.811	127.271
28.843	127.263
28.843	127.085
28.843	127.239
28.843	127.067
28.933	127.056
28.843	127.047
28.966	127.043
28.909	127.04
28.933	126.87
28.966	127.032
28.909	126.85
29.032	126.83
28.991	126.811
29.031	126.797
29.031	126.613
29.031	126.59
29.056	126.57
29.146	126.555
29.089	126.542
29.146	126.537
29.113	126.36
29.146	126.326
29.146	126.317
29.211	126.317
29.236	126.294
29.211	126.278
29.269	126.267
29.269	126.09
29.236	126.07
29.334	126.076
29.269	126.067
29.391	126.068
29.211	126.068
29.416	126.08
29.391	125.92
29.391	125.903
29.391	125.891
29.359	125.885
29.391	125.711
29.514	125.7
29.457	125.691
29.416	125.689
29.391	125.692
29.514	125.686
29.514	125.509
29.481	125.666
29.514	125.501
29.457	125.495
29.514	125.497
29.604	125.504
29.514	125.496
29.571	125.342
29.571	125.51
29.538	125.356
29.637	125.364
29.637	125.374
29.571	125.385
29.727	125.216
29.637	125.222
29.637	125.218
29.727	125.22
29.694	125.227
29.694	125.238
29.817	125.242
29.726	125.246
29.817	125.257
29.759	125.273
29.817	125.122
29.841	125.131
29.816	125.126
29.882	125.129
29.882	125.135
29.907	125.148
29.882	125.164
29.939	125.015
29.939	125.027
29.906	125.025
29.996	125.03
29.996	125.038
29.996	125.055
30.029	125.077
29.939	125.1
30.119	125.131
30.062	125.147
30.029	125.166
30.062	125.191
30.119	125.049
30.062	125.05
30.152	125.063
30.119	125.077
30.185	125.091
30.152	125.112
30.184	125.138
30.184	125.153
30.184	125.19
30.266	125.215
30.184	125.067
30.242	125.079
30.242	125.094
30.332	125.113
30.242	125.117
30.307	125.147
30.307	125.16
[truncated: 922 more rows]

## Sheet: Fig. 3 Porewater March
Porewater data												Methane data			Microprofile
Depth top (cm)	Depth bottom (cm)	Average depth (cm)	NH4 (umol/L)	SO4 (mmol/L)	Alkalinity (mmol/L)	H2S (umol/L)	Fe (µmol/L)	Mn (µmol/L)	Mn(II) (umol/L)	dMn(III)-L (umol/L)		Depth (cm) CH4	CH4 (mmol/L)		Depth (cm) O2	O2 (umol/L)
Bottom Water	Bottom Water	0	535.091	26.05	2.33495	0	2.42462	2.52188	3.71667	1.1		0	0.00162844		0	202.38
0	1	0.5	742.264	25.7	5.46367	0	3.00387	356.314	0	379.833		4	0.279788		0.1	185.45
1	2	1.5	1145.99	24.3	7.64622	0	156.476	437.336	146.3	38.8333		9	0.751441		0.2	165.72
2	3	2.5	1624.08	23.4	9.09041	0	545.529	332.736	256.633	90.3		14	1.18415		0.3	154.46
3	4	3.5	2038.42	21.4	11.7597	0	788.702	261.808	211.7	60.5		19	1.49027		0.4	134.75
4	5	4.5	2718.37	19.6	15.369	0	1106.86	210.176	160.5	53.8667		24	1.06535		0.5	82.95
5	6	5.5	3674.56	17	18.2154	0	789.24	187.745	175.4	24.2		29	1.99751		0.6	16.02
6	7	6.5	4365.13	15.2	21.5862	0.276472	533.3	172.58	158.167	14.6		34	1.95651		0.7	0
7	8	7.5	5331.94	11.7	27.2386	0.792582	269.134	149.279	156.7	20.4667		39	1.97451		0.8	0
8	9	8.5	5161.95	9.58	30.3725	37.9009	7.39997	145.238	57	90		44	1.574		0.9	0
9	10	9.5	5735.66	7.21	31.4301	37.8142	7.97358	129.394	33.9667	97.8333		49	1.88324		1	0
11	12	11.5	7212.43	3.66	40.6165	1075.61	2.45641	99.2559	0	130.667		54	1.88044		1.1	0
13	14	13.5	8115.5	1.43	45.0391	832.231	4.19694	81.3766	5.13333	90.4333		59	2.16771		1.2	0
15	16	15.5	9358.53	0.655	47.7085	2050.87	2.10452	68.3996	0	66.9333		64	1.27045		1.3	0
17	18	17.5	9868.5	0.959	47.7546	1842.25	2.52264	62.7552	-	-		69	0.552712		1.4	0
19	20	19.5	10644.1	1.04	51.6622	1207.71	2.66282	57.2523	-	-		74	1.1988		1.5	0
21	22	21.5	11547.1	0.788	53.2711	407.596	2.82739	56.7573	1.5	55.2333		79	0.938212		1.6	0
23	24	23.5	11600.3	0.69	54.5774	112.667	5.18462	58.7829	-	-		84	0.697689		1.7	0
25	26	25.5	11568.4	0.503	56.6011	595.524	2.67512	67.1948	4.56667	64.1		89	0.412866		1.8	0
27	28	27.5	12312.1	0.408	59.7264	572.777	2.43896	69.4107	-	-					1.9	0
29	30	29.5	12800.8	0.446	60.5601	91.4993	3.2482	61.5837	0	56.7333					2	0
31	32	31.5	12248.3	0.573	60.5413	206.963	5.24235	70.2308	18.7667	50.6333					2.1	0
33	34	33.5	10984	0.471	62.4908	66.905	3.8896	76.1041	41.4667	41.5333					2.2	0
35	36	35.5	14086.3	0.605	63.2761	64.7867	3.97146	74.9703	18.9	67.0667					2.3	0
37	38	37.5	12131.5	0.454	64.2493	6.00291	6.9584	76.4232	18.6	62.1333					2.4	0
39	40	39.5	12460.8	0.449	64.0352	5.53979	6.83233	66.2403	25.3	41.5333					2.5	0
41	42	41.5	12035.8	0.363	-	6.01579	8.55799	72.5807	0	81.8					2.6	0
43	44	43.5	12386.4	0.238	64.8945	4.06621	7.57961	58.7257	43.4	14.5					2.7	0
45	46	45.5	12885.8	0.247	67.0054	4.07898	7.30623	61.5832	29	29.2333					2.8	0
47	48	47.5	12428.9	0.229	68.2105	1.98012	5.95602	64.3385	32.6	36.2333					2.9	0
49	50	49.5	12567.1	0.25	67.8699	2.17017	6.46406	59.2523	0	68.7333					3	0
54	55	54.5	12333.3	0.161	68.6543	2.46187	6.48218	51.4175	18.4333	31.1333					3.1	0
59	60	59.5	12375.8	0.141	70.1588	3.65775	5.2936	50.0033	24.3667	25.5					3.2	0
64	65	64.5	12800.8	0.0855	72.0596	3.61949	6.47343	55.3658	-	-					3.3	0
69	70	69.5	14001.3	0.0603	73.0627	2.66501	7.1609	57.7574	17.4	38.65					3.4	0
74	75	74.5	14851.3	0.0567	75.9975	2.66501	6.37271	60.7982	-	-					3.5	0
79	80	79.5	15637.5	0.0481	77.7198	3.63224	6.31045	71.1851	14.8333	48.6667					3.6	0
84	85	84.5	17082.4	0.0425	78.4636	2.08146	6.2585	83.211	-	-					3.7	0
89	90	89.5	16328	0.0376	78.3561	2.86831	6.07009	70.4384	10.1667	61.9667					3.8	0
															4.1	0

## Sheet: Fig. 3 Porewater September
Porewater data												Methane data
Depth top (cm)	Depth bottom (cm)	Depth (cm)	NH4 (umol/L)	SO4 (mmol/L) IC	Alkalinity (meq)	H2S (umol/L)	Fe (µmol/L)	Mn (µmol/L)	Mn(II) (umol/L)	Mn(III) weak (umol/L)		Depth (cm)	CH4 (mmol/L)
Bottom Water	Bottom Water	0	232.299	25.6729	3.99156	111.762	1.78012	12.0697	0.639124	9.93134		0	0.091559
0	1	0.5	264.172	21.1111	14.2273	2556.7	0.572354	26.8176	3.58944	15.1664		4	1.11849
1	2	1.5	2165.91	17.4172	20.3438	3646.31	0.686656	24.462	5.49546	11.7268		9	3.64252
2	3	2.5	2644	15.4281	26.1241	4648.64	0.438247	20.8874	-	-		14	4.1307
3	4	3.5	3228.34	10.5083	33.9396	4678.59	0.70988	21.6502	9.43684	8.19813		19	4.69334
4	5	4.5	3876.42	7.46433	38.7166	4757.89	1.90877	27.2351	6.61118	18.585		24	4.99021
5	6	5.5	4598.87	3.95641	43.7645	4253.74	1.00112	34.3905	-	-		29	4.5526
6	7	6.5	4577.62	2.77753	46.1067	4263.85	0.433699	43.4041	2.95424	28.3593		34	4.86009
7	8	7.5	5385.06	2.44985	46.0467	2286.8	1.72572	47.3269	3.95826	17.8442		39	4.82527
8	9	8.5	6596.23	1.57881	48.2699	1723.45	2.0315	52.294	-	-		44	2.3333
9	10	9.5	6065.01	0.867546	49.2046	788.136	1.33422	54.4156	-	-		49	4.61457
11	12	11.5	5958.77	0.837844	50.3797	15.061	22.5913	49.8173	0	37.7982		54	3.9709
13	14	13.5	7371.8	0.304751	52.0467	9.39962	62.1186	81.8635	9.5541	49.261		59	4.44279
15	16	15.5	8912.31	0.583468	51.4105	10.8526	11.9599	77.4875	-	-		64	4.6056
17	18	17.5	7658.65	0.313208	54.4613	13.3854	6.69769	112.633	3.36078e-11	68.6996		69	2.32328
19	20	19.5	8242.99	0.290245	55.8443	12.1819	6.23581	97.0474	-	-		74	2.76695
21	22	21.5	9188.54	0.271812	57.3916	7.68254	3.69897	92.1517	-	-		79	4.09161
23	24	23.5	9454.15	0.162525	59.2627	56.8796	3.03796	89.8807	0	74.2263
25	26	25.5	10229.7	0.401477	59.1649	48.2665	2.81106	68.3113	-	-
27	28	27.5	9889.75	0.826547	58.801	83.5023	2.03046	61.6316	-	-
29	30	29.5	10548.4	0.606722	58.0222	26.4903	3.00115	56.4043	-	-
31	32	31.5	10527.2	0.668008	60.3226	34.6106	3.2023	58.6435	-	-
33	34	33.5	11377.1	0.311129	62.3918	17.2713	5.90048	55.8164	2.42867	33.9728
35	36	35.5	11919	0.237833	61.8093	38.5082	12.9196	56.0398	-	-
37	38	37.5	11919	0.229814	64.1379	114.816	1.48755	55.2966	12.9379	27.8908
39	40	39.5	11908.4	0.0934948	64.8187	96.6911	1.50443	58.6482	-	-
41	42	41.5	11387.8	0.0933383	65.6716	26.0318	5.16668	59.4505	3.39617	39.8022
43	44	43.5	13034.5	0.0324854	66.4548	46.0806	1.8498	64.2184
45	46	45.5	12397.1	0.0389343	66.9651	28.1077	3.29028	67.2248
47	48	47.5	12354.6	0.0328968	68.19	21.146	6.96206	71.144
49	50	49.5	13013.3	0.0139852	69.4235	32.0349	9.82847	68.7231
54	55	54.5	13321.4	0.0259565	71.3293	35.6987	14.2798	53.483
59	60	59.5	12864.5	0.020282	74.2381	30.1281	8.4001	57.1421
64	65	64.5	13703.9	0.0235375	76.4908	18.1741	6.80167	63.3976
69	70	69.5	13597.6	0.0219642	75.9387	33.384	5.10838	69.2311
74	75	74.5	15456.9	0.0183331	80.93	58.9823	11.3716	71.0596
79	80	79.5	16466.2	-	-	27.7723	3.92181	81.6249

## Sheet: Fig. 4 Solid Phase March
Sediment data
Depth top (cm)	Depth bottom (cm)	Sample depth (cm)	Porosity vol. %	TOC (%)	Fe Ascorbic acid (umol/g)	Fe HCl (umol/g)	Fe CDB (umol/g)	Fe Ammonium Oxalate (umol/g)	Fe HNO3 (umol/g)	Mn Ascorbic acid (umol/g)	Mn HCl (umol/g)	Mn HNO3 (umol/g)
0	1	0.5	94.3933	2.68268	97.6936	107.394	86.3884	21.0075	54.7819	5.70358	9.02042	0.42401
1	2	1.5	93.596	2.42124	85.9311	97.5954	66.2101	17.3489	53.9535	4.445	7.67129	0.389098
2	3	2.5	93.0006	2.46664	86.0659	103.101	72.2269	19.4737	54.883	3.966	7.98475	0.406775
3	4	3.5	91.9834	2.52249	-	-	-	-	-	-	-	-
4	5	4.5	91.6189	2.38129	78.6932	103.076	80.2036	18.4711	44.466	3.53845	8.09675	0.315013
5	6	5.5	91.1343	2.31197	72.8628	101.284	75.4929	17.582	42.4432	3.8941	8.11243	0.291382
6	7	6.5	90.6889	2.41269	64.2318	109.1	63.845	16.4126	43.0112	4.02141	9.0101	0.308497
7	8	7.5	90.2763	2.5508	-	-	-	-	-	-	-	-
8	9	8.5	90.6813	2.66946	41.0239	166.38	53.9704	17.7838	51.409	4.47693	8.69675	0.374715
9	10	9.5	90.5858	2.64561	36.5802	187.352	50.3231	15.6517	47.3954	3.782	7.90287	0.337363
10	11	10.5	90.3344	2.69032	0	0	0	0	0	0	0	0
11	12	11.5	90.356	2.72538	46.7023	192.241	53.9289	16.7914	50.2203	3.85553	6.79824	0.382334
12	13	12.5	90.401	2.89701	-	-	-	-	-	-	-	-
13	14	13.5	90.7528	3.062	66.9022	163.816	49.0111	14.8269	46.0629	3.0358	6.13561	0.386031
14	15	14.5	91.5636	3.27588	-	-	-	-	-	-	-	-
15	16	15.5	91.9674	3.10116	58.2737	177.734	35.8736	13.933	45.9018	2.77618	5.69076	0.398038
16	17	16.5	93.4148	3.20742	65.232	162.737	34.5412	14.6006	47.5772	2.4623	5.29106	0.387526
17	18	17.5	93.9367	3.23929	56.1118	173.41	40.9828	15.2873	50.4384	1.92465	5.53788	0.4072
18	19	18.5	94.0385	3.92428	56.3392	182.646	35.2373	15.0201	48.1122	1.95456	5.30881	0.379524
19	20	19.5	94.0124	3.69597	50.2941	232.771	43.6637	15.6482	45.7979	2.02028	5.96487	0.335899
20	21	20.5	94.6392	2.59245	45.6029	222.195	40.2801	17.0053	46.1735	2.1245	7.30613	0.319365
21	22	21.5	93.1733	2.43419	47.9067	199.513	46.1755	18.5079	43.5501	3.05656	8.07446	0.303975
22	23	22.5	91.5206	2.41576	46.6416	168.026	38.3601	14.564	46.1724	3.30983	6.68685	0.311054
23	24	23.5	90.8563	2.67419	-	-	-	-	-	-	-	-
24	25	24.5	90.5796	2.61967	47.537	191.429	43.8088	14.8235	52.1124	3.18073	6.13376	0.370107
25	26	25.5	90.4719	2.87894	-	-	-	-	-	-	-	-
26	27	26.5	90.103	2.97013	63.3724	170.997	33.7592	13.4375	51.1902	2.34728	5.55574	0.388766
27	28	27.5	90.2004	2.99924	66.0349	171.19	34.6146	13.6159	50.6878	2.02201	5.51596	0.404456
28	29	28.5	91.2566	3.27307	64.0204	200.613	48.5007	12.5722	46.2983	2.47194	5.50049	0.345104
29	30	29.5	92.602	3.18304	57.8815	195.804	35.253	13.8399	43.8211	2.46865	6.25761	0.303364
30	31	30.5	94.0293	2.77385	-	-	-	-	-	-	-	-
31	32	31.5	93.8711	2.92798	55.2396	221.953	36.0367	14.1963	46.2522	3.1143	7.14159	0.311617
32	33	32.5	92.5581	2.40013	-	-	-	-	-	-	-	-
33	34	33.5	91.5248	2.71646	50.0346	227.284	53.6698	14.9246	54.0914	3.00514	8.02993	0.464067
34	35	34.5	91.274	2.32388	-	-	-	-	-	-	-	-
35	36	35.5	91.2838	2.24691	49.0105	209.009	48.0254	15.7983	52.3646	3.17542	9.96925	0.509827
36	37	36.5	90.3446	2.189	52.0879	172.213	40.1508	14.2931	52.0603	3.29535	10.5626	0.455832
37	38	37.5	90.1926	2.25562	41.1168	167.077	42.9697	14.8858	54.3525	4.46553	9.98643	0.45692
38	39	38.5	89.3659	2.30014	-	-	-	-	-	-	-	-
39	40	39.5	89.6494	2.25205	46.8291	231.72	28.0154	14.5147	56.6652	4.1984	9.40912	0.451001
40	41	40.5	89.847	2.40936	44.4702	215.549	46.5652	14.8503	55.6425	4.69264	8.32311	0.427162
41	42	41.5	89.6681	2.40192	63.6558	177.281	40.263	16.0904	59.0167	4.37962	7.48677	0.456751
42	43	42.5	89.6135	2.75534	72.2955	168.801	36.7489	13.9706	51.7059	4.67751	6.80956	0.413755
43	44	43.5	89.3514	2.65136	74.234	180.381	63.0065	14.3074	48.2765	3.37963	6.78074	0.371289
44	45	44.5	89.5105	2.86084	43.6845	253.149	38.3795	14.8047	47.249	3.01349	6.46537	0.353102
45	46	45.5	89.458	2.48755	38.7554	190.926	52.8281	15.1613	53.3343	3.46292	8.01076	0.378648
46	47	46.5	89.8891	2.67908	42.8147	191.022	39.5471	15.6304	55.415	2.80856	6.65738	0.365023
47	48	47.5	92.1565	2.30816	61.3097	214.727	50.7657	14.3969	60.2018	2.51064	7.12408	0.388353
48	49	48.5	91.7473	2.57759	64.6156	189.485	39.7252	14.91	58.6442	2.57884	5.98391	0.382959
49	50	49.5	89.9184	2.50306	-	-	-	-	-	-	-	-
50	51	50.5	89.3344	2.6629	46.2295	193.255	38.0876	14.1512	46.26	2.45711	5.27015	0.342474
51	52	51.5	89.6454	3.05769	56.5366	193.156	31.4648	14.0895	47.8079	2.38202	5.24765	0.353038
52	53	52.5	90.17	2.63316	79.8005	173.349	35.3529	14.1947	43.8738	1.87832	5.28684	0.298339
53	54	53.5	90.9878	2.30639	47.5342	215.777	45.6783	15.0929	44.0263	1.47362	7.50159	0.307681
54	55	54.5	90.3433	2.25295	62.5527	189.723	44.1916	14.4473	49.1896	1.47739	8.71687	0.36576
55	56	55.5	89.9039	2.26295	-	-	-	-	-	-	-	-
56	57	56.5	89.5244	2.17603	48.4042	186.724	46.7007	14.0636	47.1257	2.58715	7.88944	0.36434
57	58	57.5	89.3957	2.26726	-	-	-	-	-	-	-	-
58	59	58.5	89.5491	2.19938	40.7071	216.359	37.2851	13.5766	45.8037	2.06074	7.07192	0.368651
59	60	59.5	89.4556	2.47904	52.0362	190.459	30.3156	11.1945	49.4825	2.98386	6.21991	0.373215
60	61	60.5	89.5699	2.51482	-	-	-	-	-	-	-	-
61	62	61.5	89.9437	2.521	73.3405	189.586	40.187	12.8034	45.938	2.41534	6.32305	0.334257
62	63	62.5	90.3386	2.63366	67.2963	211.181	29.7835	12.8595	45.9411	2.82361	6.91759	0.330112
63	64	63.5	90.8744	2.58913	56.279	231.847	44.0531	13.0835	46.9952	1.80595	6.66902	0.33242
64	65	64.5	90.9276	2.54309	55.0365	220.845	32.9003	10.8478	45.7937	1.98719	6.85309	0.319917
65	66	65.5	90.2579	2.45248	-	-	-	-	-	-	-	-
66	67	66.5	89.9936	2.31549	41.9195	207.108	42.6779	13.7463	55.179	1.70877	7.98191	0.538867
67	68	67.5	89.6815	2.37246	57.9458	191.366	34.0711	12.6994	52.735	2.08801	6.7315	0.595189
68	69	68.5	89.587	2.27316	61.1995	192.608	40.9373	10.2174	56.486	1.97683	6.64927	0.526791
69	70	69.5	89.5776	2.50026	52.6149	181.2	29.9156	11.5895	57.1785	2.69979	5.89169	0.537578
70	71	70.5	91.3616	2.55511	57.0735	213.345	38.2922	12.4589	56.0582	2.34168	7.90372	0.519417
71	72	71.5	91.0988	2.35642	39.68	201.375	44.2989	12.3887	57.2297	2.25288	8.8814	0.577812
72	73	72.5	89.4971	1.99495	43.8302	182.944	36.9724	12.3587	61.5976	2.13826	9.34672	0.756511
73	74	73.5	89.1125	2.27586	39.1632	202.093	34.8127	11.9628	80.7218	1.78434	7.80283	0.997075
74	75	74.5	89.1462	2.58117	41.6625	197.671	38.2408	11.898	107.248	2.07254	7.25361	1.41956
75	76	75.5	89.5296	2.59437	36.3836	167.296	34.6819	11.1667	122.762	2.68109	6.221	1.57178
76	77	76.5	90.2853	2.95832	27.9019	176.971	33.3241	11.7821	116.836	3.29261	6.47064	1.31658
77	78	77.5	91.5911	2.66261	36.4592	174.806	33.8123	11.6082	103.404	3.10108	7.3224	1.07345
78	79	78.5	90.0068	2.11831	40.0609	176.967	45.8995	11.1701	100.381	3.28454	8.99766	1.05781
79	80	79.5	88.9494	2.38478	33.3899	177.193	23.2139	12.564	92.1129	2.30983	9.02771	0.995906
80	81	80.5	88.9059	2.32767	-	-	-	-	-	-	-	-
81	82	81.5	88.9088	2.13725	41.7642	172.523	38.53	12.8766	105.531	1.95856	7.86313	0.91836
82	83	82.5	89.0106	2.3474	36.2931	174.681	36.4681	11.8649	113.373	2.31551	7.42001	0.850014
83	84	83.5	89.1578	2.77186	42.361	172.918	32.9265	11.7769	107.348	3.41514	7.03441	0.689732
84	85	84.5	89.7115	2.80553	41.9216	216.184	37.9923	12.4894	101.138	3.30051	7.43081	0.580326
85	86	85.5	90.9633	2.43849	-	-	-	-	-	-	-	-
86	87	86.5	90.0359	2.40395	38.9367	223.322	33.9871	15.0228	83.3834	3.76838	8.53662	0.527326
87	88	87.5	89.3662	2.59013	-	-	-	-	-	-	-	-
88	89	88.5	89.4289	2.44808	39.6859	202.67	56.1937	17.219	77.8971	3.28694	8.03093	0.522782
89	90	89.5	88.9541	2.63289	46.4716	216.083	48.3007	14.3637	79.5998	3.01979	8.2399	0.543396
90	91	90.5	89.5964	2.47465	30.6101	195.939	34.4134	14.1629	84.4674	2.50974	7.23872	0.561113
91	92	91.5	91.131	2.6663	41.2418	219.013	24.924	14.0331	83.8405	2.37085	6.87493	0.502862
92	93	92.5	90.6381	2.94281	34.8828	223.244	18.1794	13.3927	79.4596	3.08082	7.16214	0.489679
93	94	93.5	89.2815	2.65117	49.307	198.513	14.0525	13.0905	80.1682	2.47722	6.76296	0.515722
94	95	94.5	88.769	2.52317	37.0413	219.141	25.3591	13.727	94.8707	2.21167	7.96882	0.750632
95	96	95.5	88.769	2.56928	45.7708	176.944	21.2689	12.0189	82.1972	1.85667	7.07775	0.784615
96	97	96.5	88.769	2.42812	40.6524	186.82	30.4972	14.1326	67.7778	2.61144	7.05976	0.603652

## Sheet: Fig. 4 Solid Phase September
Sediment data
Depth top (cm)	Depth bottom (cm)	Sample depth (cm)	Porosity vol. %	TOC (%)	Fe Ascorbic acid (umol/g)	Fe HCl (umol/g)	Fe CDB (umol/g)	Fe Ammonium Oxalate (umol/g)	Fe HNO3 (umol/g)	Mn Ascorbic acid (umol/g)	Mn HCl (umol/g)	Mn HNO3 (umol/g)
0	1	0.5	96.9815	3.46325	69.2742	108.188	24.4177	4.92872	32.4461	1.15114	3.35094	1.0531
1	2	1.5	97.8207	3.22602	71.405	105.974	20.0278	4.96156	34.3347	1.12048	3.32271	1.11863
2	3	2.5	96.346	3.55814	73.8909	111.991	27.7445	4.76474	34.5687	0.954271	3.4571	1.50241
3	4	3.5	97.0898	3.63428	82.7983	115.493	47.7771	4.42508	32.0331	1.07101	3.30676	1.17222
4	5	4.5	96.5921	3.90527	79.0233	124.67	32.5755	3.00417	30.3446	1.2071	3.41234	1.06865
5	6	5.5	95.4368	3.82842	67.3017	144.094	38.3151	3.92843	31.4309	1.37098	3.5385	1.19978
6	7	6.5	92.9861	3.5102	73.976	193.665	27.1698	4.83939	30.4169	2.36241	5.12035	1.25528
7	8	7.5	91.5351	2.51897	83.9009	149.151	30.5145	5.40501	32.2836	3.63224	5.93375	1.10577
8	9	8.5	91.2677	2.36423	52.6761	165.316	27.8877	4.98477	34.041	3.64672	7.06292	1.38746
9	10	9.5	90.8775	2.41582	56.7404	147.809	32.3377	4.72242	32.8949	4.16122	6.97904	1.22235
10	11	10.5	90.4155	2.15677	51.9959	119.236	28.9488	4.60741	31.4882	3.48912	6.97936	1.93606
11	12	11.5	90.4901	2.39933	49.837	121.753	33.0925	4.19365	30.2355	4.97793	6.98736	1.11772
12	13	12.5	90.2214	2.25734	53.5352	112.521	32.496	3.81544	28.2236	4.71271	6.94022	1.17267
13	14	13.5	90.1325	2.3082	49.2568	114.669	33.0299	3.70172	27.3831	3.83329	8.09491	1.74369
14	15	14.5	89.9249	2.43779	55.5751	121.687	38.222	3.76439	26.5282	5.16403	7.54369	1.11849
15	16	15.5	89.3203	3.58769	53.5506	135.222	50.9397	4.86958	27.103	5.8421	6.94657	0.862681
16	17	16.5	89.4514	2.5276	49.6663	165.186	40.3252	5.06018	30.789	4.95703	7.43807	1.30906
17	18	17.5	89.7504	2.56271	50.9206	177.215	30.8051	4.43439	31.4606	4.43121	7.07736	1.28285
18	19	18.5	89.5647	2.47917	57.5955	149.032	26.7791	4.3694	31.3898	4.333	5.4617	0.955361
19	20	19.5	89.6642	2.521	69.8865	139.52	27.3484	3.91129	31.4807	3.03808	5.5914	1.45151

## Sheet: Fig.6 Integrated reaction rates
Reaction rates (mmol/m2/d)
Process	Januari	Februari	March	April	May	June	July	August	September	October	November	December
Mn oxide + H2S	0.00606036	0.00535022	0.00477737	0.00449897	0.0045799	0.00518393	0.00613429	0.00782319	0.00992052	0.00934214	0.0082271	0.00731861
Mn oxide + Fe	0.145762	0.212684	0.280425	0.33171	0.145613	0.0530077	0.0223359	0.0122304	0.0121231	0.0226189	0.0409244	0.0776298
Mn(II) + O2	0.19762	0.246864	0.293095	0.230981	-8.46241e-22	-1.24642e-23	8.474e-22	-2.64708e-41	-5.07752e-62	0.0300457	0.0728919	0.132505
Mn oxide + OM	0.276782	0.289548	0.301671	0.0488421	0.029548	0.029547	0.0295464	0.0293244	0.0293559	0.222189	0.247144	0.261384
Burial Mn(III)	0.0182443	0.0181493	0.0179637	0.00906043	0.00898201	0.00891973	0.00887579	0.00884904	0.00883487	0.0173662	0.0173438	0.0171976
Benthic flux Mn(III)	0.173593	0.19491	0.214537	0.207388	0.0312181	0.0303588	0.0299551	0.0285858	0.0287393	0.0879391	0.11646	0.144602
Mn(III) + H2S	0.000556234	0.000480317	0.000416985	0.000386481	0.000381569	0.000410207	0.000456728	0.00056318	0.000743232	0.000832403	0.000824255	0.000746988
Mn(III) + Fe	0.368694	0.461007	0.55446	0.468303	0.158724	0.0630515	0.0307821	0.0190046	0.0187782	0.057311	0.141744	0.253352
Mn(III) + O2	0.0733989	0.0865092	0.0990273	0.0259366	-1.90408e-24	-2.52781e-26	2.03828e-24	-1.06243e-43	-3.62337e-64	0.0277516	0.0430595	0.0574316
Mn(III) + OM	0.019673	0.0194528	0.0193814	0.0261551	0.0128988	0.0128847	0.0128523	0.0122799	0.0116031	0.0159228	0.019197	0.0201264

## Sheet: Fig. 7 Benthic Fluxes
Benthic fluxes (mmol/m2/d)
Compound	Januari	Februari	March	April	May	June	July	August	September	October	November	December
Mn(II)	0.0113125	0.0128593	0.014159	0.0744287	0.140031	0.0741627	0.0417901	0.0242759	0.014506	0.00303464	0.00552028	0.00862342
Mn(III)	0.173593	0.19491	0.214537	0.207388	0.0312181	0.0303588	0.0299551	0.0285858	0.0287393	0.0879391	0.11646	0.144602

## Sheet: Fig. 8 Sensitivity Analysis
Reaction rates in oxic basin (mmol/m2/d)												Reaction rates in euxinic basin (mmol/m2/d)
C org oxidation rate (mmol/m2/d)	Mn oxide + H2S (mmol/m2/d)	Mn oxide + Fe(II) (mmol/m2/d)	Mn(II) + O2 (mmol/m2/d)	Mn oxide + OM (mmol/m2/d)	Mn(III) + H2S (mmol/m2/d)	Mn(III) + Fe(II) (mmol/m2/d)	Mn(III) + O2 (mmol/m2/d)	Mn(III) + OM (mmol/m2/d)	Benthic Flux Mn(III) (mmol/m2/d)	Benthic Flux Mn(II) (mmol/m2/d)		C org oxidation rate (mmol/m2/d)	Mn oxide + H2S (mmol/m2/d)	Mn oxide + Fe(II) (mmol/m2/d)	Mn(II) + O2 (mmol/m2/d)	Mn oxide + OM (mmol/m2/d)	Mn(III) + H2S (mmol/m2/d)	Mn(III) + Fe(II) (mmol/m2/d)	Mn(III) + O2 (mmol/m2/d)	Mn(III) + OM (mmol/m2/d)	Benthic Flux Mn(III) (mmol/m2/d)	Benthic Flux Mn(II) (mmol/m2/d)
0.561591	3.90404e-05	0.165017	0.0184593	0.00573779	1.10548e-06	0.190669	0.0153924	4.8267e-05	0.000370877	3.03564e-10		0.85831	0.000221075	0.203151	-6.81849e-13	0.0126354	3.07955e-06	0.239844	-3.07664e-14	5.53335e-05	0.0140948	0.0172682
1.41035	5.01369e-05	0.279427	0.0250534	0.0137613	2.36132e-06	0.332307	0.0177718	0.000137334	0.000983239	2.07693e-09		2.15104	0.000169648	0.324572	-6.47726e-12	0.0184607	4.59451e-06	0.431883	-1.00581e-13	0.000158721	0.0207908	0.0581721
2.81557	6.11992e-05	0.375932	0.030037	0.0269554	4.41666e-06	0.466247	0.0202443	0.000288925	0.00251897	2.1812e-08		4.34698	0.000144718	0.427952	1.77907e-12	0.0197529	7.30915e-06	0.576253	1.88046e-14	0.000328187	0.0261423	0.120847
5.57359	7.68108e-05	0.407659	0.0380964	0.0474766	8.15184e-06	0.56511	0.0250573	0.000626465	0.0108318	4.6818e-06		8.83565	0.000144311	0.473245	4.00442e-12	0.0145885	1.26354e-05	0.595263	1.44641e-14	0.000588588	0.0320567	0.180897
13.9044	0.000216759	0.332421	0.0555045	0.0688596	2.35853e-05	0.581343	0.0315367	0.00187416	0.0782733	0.00124599		22.8834	0.000272696	0.396199	-8.73451e-16	0.00766159	2.38785e-05	0.428083	2.43005e-17	0.000753367	0.030997	0.179302
32.9121	0.00113928	0.248132	0.0613613	0.064729	7.10551e-05	0.49455	0.0250847	0.00272995	0.147587	0.00893119		52.101	0.00115812	0.241808	4.99209e-19	0.00733087	6.41116e-05	0.251541	6.74048e-22	0.000948397	0.0293221	0.139946
52.7916	0.00314806	0.20529	0.0530573	0.0611926	0.000219102	0.409192	0.0186496	0.00331181	0.163349	0.0156767		83.3684	0.00321386	0.115801	-2.92085e-20	0.00735499	0.000200335	0.124262	-3.92547e-23	0.00156377	0.0294857	0.0961698
69.7308	0.00651068	0.158822	0.0430001	0.0588415	0.000606238	0.329267	0.0147541	0.00499673	0.162775	0.0185625		112.661	0.00672837	0.0490619	-5.65263e-25	0.00736609	0.000510983	0.0580681	5.44643e-27	0.00312594	0.0297714	0.0589532
87.1977	0.0105177	0.121282	0.0355804	0.0572578	0.00119515	0.266237	0.0122766	0.00776358	0.161422	0.0199817		140.476	0.0123366	0.0199781	-1.22081e-21	0.00737229	0.00111816	0.0286367	-3.30494e-24	0.00562307	0.0300148	0.036086
105.234	0.0188616	0.0879001	0.0294615	0.0560334	0.00276069	0.206985	0.0104745	0.0117991	0.159104	0.0201634		167.285	0.0213508	0.00519236	6.64326e-21	0.00737634	0.00255872	0.00885741	-1.46476e-23	0.009326	0.0302795	0.0220069
123.71	0.0580044	0.0636123	0.024159	0.0550537	0.0186275	0.161698	0.00909369	0.0179633	0.156039	0.0192174		193.465	0.0603702	0.000822961	2.39901e-25	0.00737921	0.0179485	0.00179582	4.879e-27	0.0151359	0.0306333	0.0136861
142.608	0.12203	0.0432284	0.0193215	0.0542448	0.0538939	0.123602	0.0079911	0.027185	0.152299	0.0171583		218.822	0.125567	0.000373029	-2.63917e-23	0.00738131	0.0534211	0.00095164	-5.04953e-25	0.0240898	0.0311931	0.00890424

## Sheet: Fig. S2 dMn(III)-L March
			dMn(II) (umol/L)				dMn(III)-L (umol/L)				dMn tot (umol/L)				Percentage (%)
Depth top (cm)	Depth bottom (cm)	Average depth (cm)	dMn(II) 1	dMn(II) 2	dMn(II) 3	Average dMn(II)	dMn(III)-L 1	dMn(III)-L 2	dMn(III)-L 3	average dMn(III)-L	dMn tot 1	dMn tot 2	dMn tot 3	average dMn tot	dMn(II) (%)	dMn(III)-L
Bottom water	Bottom water	0	1.8	3.2	9	4.66667	0	1.2	0	0.4	1.8	4.4	9	5.06667	92.1053	7.89474
Bottom water	Bottom water	0	1.9	1.3	5.1	2.76667	1.7	2.3	1.4	1.8	3.6	3.6	6.5	4.56667	60.5839	39.4161
0	1	0.5	0	0	0	0	370.9	386.7	381.9	379.833	370.9	386.7	381.9	379.833	0	100
1	2	1.5	138.8	140	160.1	146.3	37.1	7.5	71.9	38.8333	175.9	147.5	232	185.133	79.0241	20.9759
2	3	2.5	286	239.9	244	256.633	60.1	122	88.8	90.3	346.1	361.9	332.8	346.933	73.9719	26.0281
3	4	3.5	245.1	231.3	158.7	211.7	12.8	47.3	121.4	60.5	257.9	278.6	280.1	272.2	77.7737	22.2263
4	5	4.5	188.9	169.3	170.9	176.367	33.3	37.9	43.1	38.1	222.2	207.2	214	214.467	82.235	17.765
5	6	5.5	202.9	196.2	182.9	194	0	0.1	16.7	5.6	202.9	196.3	199.6	199.6	97.1944	2.80561
6	7	6.5	161.5	161.4	180.6	167.833	4.6	6.6	3.5	4.9	166.1	168	184.1	172.733	97.1633	2.83674
7	8	7.5	137	163.6	186.5	162.367	44.3	0	0	14.7667	181.3	163.6	186.5	177.133	91.6635	8.33647
8	9	8.5	129.9	80.8	38.4	83.0333	10.7	81.5	100.1	64.1	140.6	162.3	138.5	147.133	56.4341	43.5659
9	10	9.5	87.8	44.4	55.6	62.6	30	92.4	92.2	71.5333	117.8	136.8	147.8	134.133	46.67	53.33
11	12	11.5	0	0	0	0	168.7	98.8	124.5	130.667	168.7	98.8	124.5	130.667	0	100
12	14	13.5	28.4	14.1	47.5	30	80.3	74.4	41.6	65.4333	108.7	88.5	89.1	95.4333	31.4356	68.5644
15	16	15.5	0	0	16.2	5.4	51.1	79.3	54	61.4667	51.1	79.3	70.2	66.8667	8.07577	91.9242
17	18	17.5	31.8	34.7	45.2	37.2333	33.4	25.2	25.4	28	65.2	59.9	70.6	65.2333	57.0772	42.9228
21	22	21.5	23.7	22.5	2.7	16.3	31	36.1	53.1	40.0667	54.7	58.6	55.8	56.3667	28.9178	71.0822
25	26	25.5	50.5	13	22.9	28.8	21.8	55.4	42.2	39.8	72.3	68.4	65.1	68.6	41.9825	58.0175
29	30	29.5	9.9	17.7	0	9.2	44.2	47.7	51.1	47.6667	54.1	65.4	51.1	56.8667	16.1782	83.8218
31	32	31.5	37.8	31.5	20.3	29.8667	31.1	45.9	46.8	41.2667	68.9	77.4	67.1	71.1333	41.9869	58.0131
33	34	33.5	56.6	57.5	59.6	57.9	23.3	30.5	21.8	25.2	79.9	88	81.4	83.1	69.6751	30.3249
35	36	35.5	20.3	2.6	26.7	16.5333	46.8	79.7	59.4	61.9667	67.1	82.3	86.1	78.5	21.0616	78.9384
37	38	37.5	7.1	51.3	5	21.1333	74.1	28.2	80.5	60.9333	81.2	79.5	85.5	82.0667	25.7514	74.2486
39	40	39.5	38.7	42.8	43.7	41.7333	21.6	28.5	25.2	25.1	60.3	71.3	68.9	66.8333	62.4439	37.5561
41	42	41.5	13.3	46.3	4.5	21.3667	69.8	31.8	67.9	56.5	83.1	78.1	72.4	77.8667	27.4401	72.5599
43	44	43.5	59.7	50.5	60.3	56.8333	0.3	0	2.8	1.03333	60	50.5	63.1	57.8667	98.2143	1.78571
45	46	45.5	38.6	37	37.4	37.6667	23	24.2	17.8	21.6667	61.6	61.2	55.2	59.3333	63.4831	36.5169
47	48	47.5	59	48.5	36.2	47.9	2.8	24.1	35.6	20.8333	61.8	72.6	71.8	68.7333	69.6896	30.3104
49	50	49.5	7.1	10.5	0	5.86667	68.5	58.6	61.3	62.8	75.6	69.1	61.3	68.6667	8.54369	91.4563
54	55	54.5	31.3	39.2	33.8	34.7667	20.7	14.9	14.5	16.7	52	54.1	48.3	51.4667	67.5518	32.4482
59	60	59.5	37.2	38.8	50.3	42.1	6.5	13.8	3	7.76667	43.7	52.6	53.3	49.8667	84.4251	15.5749
69	70	69.5	41.2	35.2	59.7	45.3667	10.5	23.4	8.4	14.1	51.7	58.6	68.1	59.4667	76.2892	23.7108
79	80	79.5	40.3	42.2	36.4	39.6333	18.5	28.8	24.6	23.9667	58.8	71	61	63.6	62.3166	37.6834
89	90	89.5	46	34.2	28.2	36.1333	28.2	41.4	33	34.2	74.2	75.6	61.2	70.3333	51.3744	48.6256

## Sheet: Fig. S3 dMn(III)-L September
			dMn(II) (umol/L)				dMn(III)-L (umol/L)				dMn tot (umol/L)				Percentage (%)
Depth top (cm)	Depth bottom (cm)	Average depth (cm)	dMn(II) 1	dMn(II) 2	dMn(II) 3	Average dMn(II)	dMn(III)-L 1	dMn(III)-L 2	dMn(III)-L 3	average dMn(III)-L	dMn tot 1	dMn tot 2	dMn tot 3	average dMn tot	dMn(II) (%)	dMn(III)-L
Bottom water	Bottom water	0	0	3.78959e-11	3.83474	1.27825	9.90584	8.93126	6.91855	8.58522	9.90584	8.93126	10.7533	9.86346	12.9594	87.0406
Bottom water	Bottom water	0	9.49394e-10	1.51824e-11	0	3.21526e-10	12.1422	10.7015	10.9887	11.2775	12.1422	10.7015	10.9887	11.2775	2.85104e-09	100
0	1	0.5	6.81069	0	0	2.27023	17.2147	22.3352	21.1158	20.2219	24.0254	22.3352	21.1158	22.4922	10.0934	89.9066
1	2	1.5	5.31948	16.6623	0	7.32727	14.7135	5.2256	14.8917	11.6103	20.033	21.8879	14.8917	18.9375	38.6918	61.3082
3	4	3.5	11.3848	5.85375	11.0719	9.43684	7.64061	11.3732	5.5806	8.19813	19.0254	17.2269	16.6525	17.635	53.5121	46.4879
4	5	4.5	19.8336	4.07428e-13	4.59905e-11	6.61118	4.54969	23.7382	27.467	18.585	24.3832	23.7382	27.467	25.1962	26.2388	73.7612
6	7	6.5	0.688935	0	8.17379	2.95424	31.9146	30.1083	23.055	28.3593	32.6036	30.1083	31.2288	31.3136	9.43439	90.5656
7	8	7.5	19.168	4.58154	-	11.8748	18.6615	28.1868	-	23.4242	37.8296	32.7684	-	35.299	33.6406	66.3594
11	12	11.5	0	0	0	0	35.5085	38.6394	39.2467	37.7982	35.5085	38.6394	39.2467	37.7982	0	100
13	14	13.5	0	0	28.6623	9.5541	54.2043	61.8738	31.7049	49.261	54.2043	61.8738	60.3672	58.8151	16.2443	83.7557
17	18	17.5	0	0	0	0	88.3051	110.273	76.1676	91.5819	88.3051	110.273	76.1676	91.5819	0	100
23	24	23.5	0	0	0	0	70.8804	71.1441	80.6544	74.2263	70.8804	71.1441	80.6544	74.2263	0	100
29	30	29.5	1.50519e-10	7.286	-	3.643	44.4444	36.923	-	40.6837	44.4444	44.209	-	44.3267	8.21852	91.7815
33	34	33.5	1.50519e-10	13.1511	25.6625	12.9379	40.4143	26.6229	16.635	27.8908	40.4143	39.774	42.2976	40.8286	31.6882	68.3118
41	42	41.5	1.51156e-10	0	10.1885	3.39617	38.1026	46.7608	34.5431	39.8022	38.1026	46.7608	44.7316	43.1984	7.8618	92.1382

[truncated: 1 more sheets: Fig. S7 Benthic Fluxes DMn3]
